# Supplementary material for: MCT-1/miR-34a/IL-6/IL-6R signaling axis promotes EMT progression, cancer stemness and M2 macrophage polarization in triple-negative breast cancer
Source: PubMed Central journal article supplement (PMC6421700; doi:10.1186/s12943-019-0988-0), 2019-03-18
Supplement: 12943_2019_988_MOESM1_ESM.pdf [file 12943_2019_988_MOESM1_ESM.pdf]

**Fig. S1**

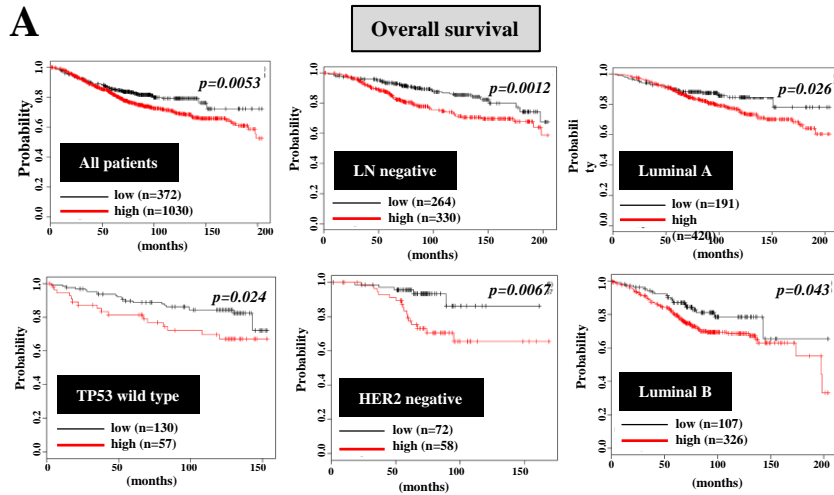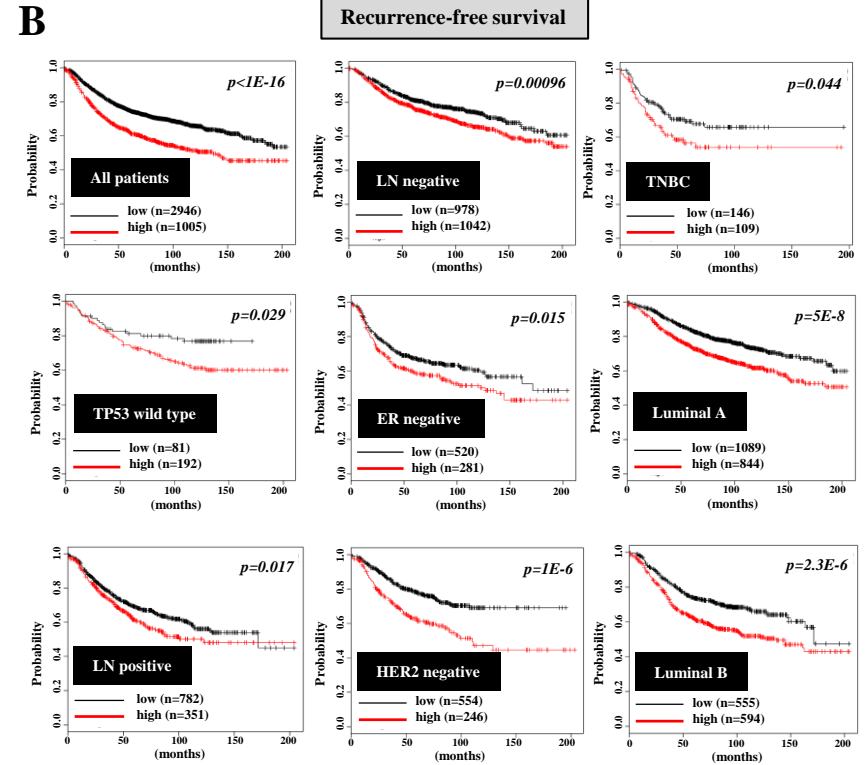

**Supplementary Fig. S1.** MCT-1 is a prognostic marker of human breast carcinoma. Using an analysis of the *Kaplan–Meier* plotter database, MCT-1 gene activation associated with OS (A) and RFS (B) were identified in different molecular types of breast cancer. A log rank test indicated the p-value.
