# Supplementary material for: MCT-1/miR-34a/IL-6/IL-6R signaling axis promotes EMT progression, cancer stemness and M2 macrophage polarization in triple-negative breast cancer
Source: PubMed Central journal article supplement (PMC6421700; doi:10.1186/s12943-019-0988-0), 2019-03-18
Supplement: 12943_2019_988_MOESM2_ESM.pdf [file 12943_2019_988_MOESM2_ESM.pdf]

**Fig. S2**

**A**

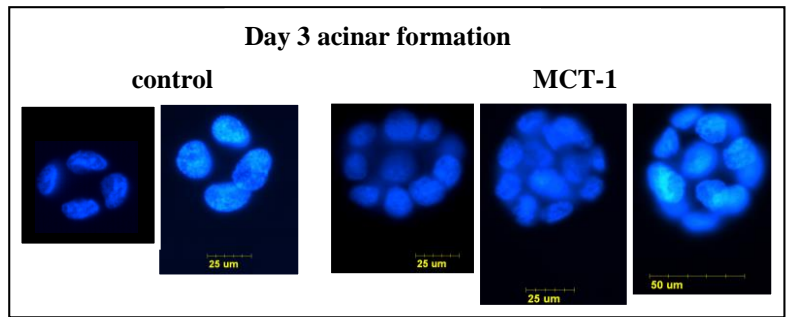

**B**

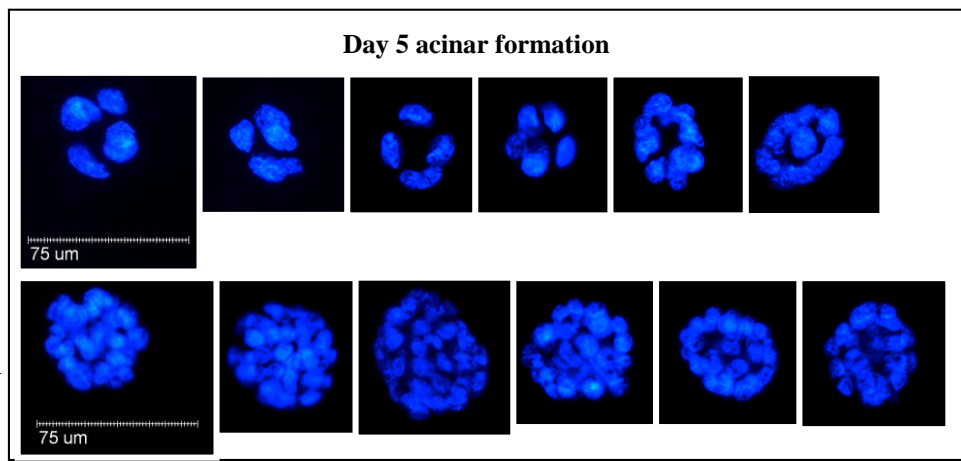

**C**

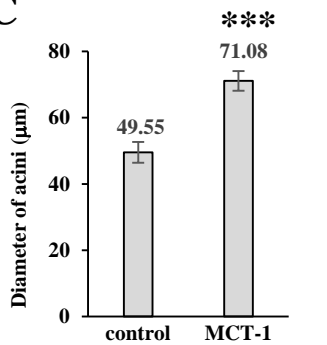

Results are mean  $\pm$ S.D. (n=10). control vs. MCT-1 group.

**D**

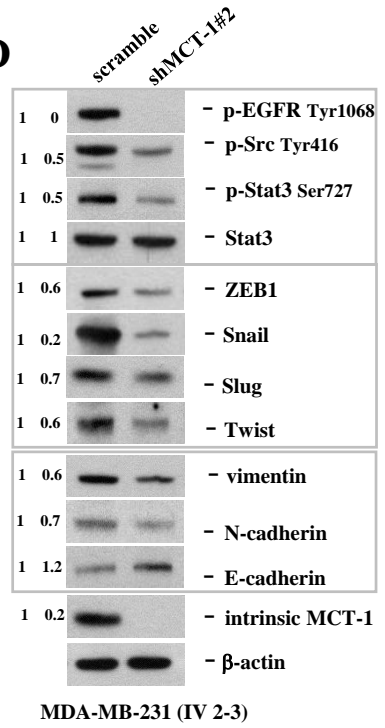

**Supplementary Fig. S2.** MCT-1 overexpression increases size of the MCF-10A acini. (A-B) The development of MCF-10A acini on Matrigel matrix were examined at day 3 (A) and day 5 (B). The size of MCF-10A acini at day 5 were quantified and compared between control and MCT-1 overexpression (C). The EGFR and Stat3 activation and EMT molecule levels were compared between scramble and shMCT-1#2 of MDA-MB-231 (IV2-3) (D).
