# Supplementary material for: MCT-1/miR-34a/IL-6/IL-6R signaling axis promotes EMT progression, cancer stemness and M2 macrophage polarization in triple-negative breast cancer
Source: PubMed Central journal article supplement (PMC6421700; doi:10.1186/s12943-019-0988-0), 2019-03-18
Supplement: 12943_2019_988_MOESM3_ESM.pdf [file 12943_2019_988_MOESM3_ESM.pdf]

**Fig. S3**

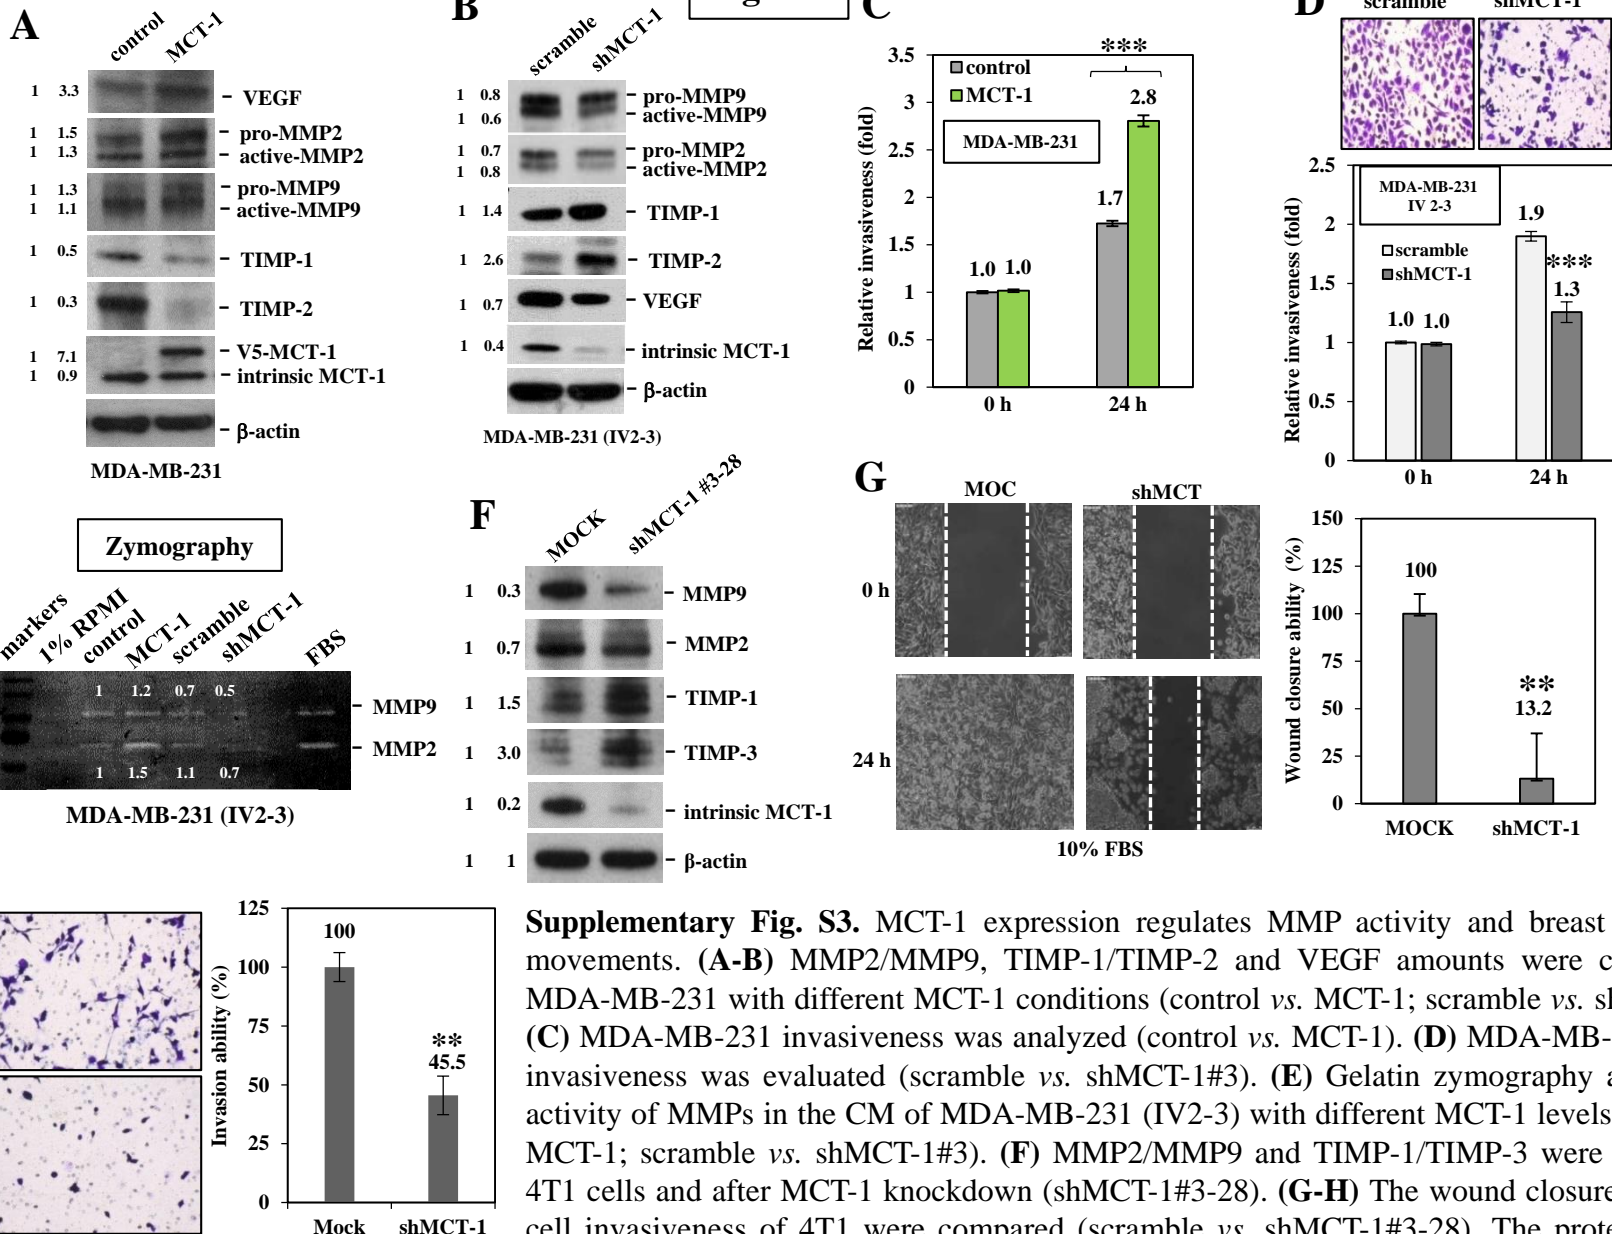

**Supplementary Fig. S3.** MCT-1 expression regulates MMP activity and breast cancer cell movements. (A-B) MMP2/MMP9, TIMP-1/TIMP-2 and VEGF amounts were compared in MDA-MB-231 with different MCT-1 conditions (control vs. MCT-1; scramble vs. shMCT-1#3). (C) MDA-MB-231 invasiveness was analyzed (control vs. MCT-1). (D) MDA-MB-231 (IV2-3) invasiveness was evaluated (scramble vs. shMCT-1#3). (E) Gelatin zymography assessed the activity of MMPs in the CM of MDA-MB-231 (IV2-3) with different MCT-1 levels (control vs. MCT-1; scramble vs. shMCT-1#3). (F) MMP2/MMP9 and TIMP-1/TIMP-3 were analyzed in 4T1 cells and after MCT-1 knockdown (shMCT-1#3-28). (G-H) The wound closure ability and cell invasiveness of 4T1 were compared (scramble vs. shMCT-1#3-28). The protein amounts were compared with the controls. Different blots with normalized internal control were used to present the data of the experiment. The results are presented as the mean  $\pm$  standard derivation (SD) of triplicate assays (n=3). (\*\*p<0.01, \*\*\*p<0.001)
