# Supplementary material for: MCT-1/miR-34a/IL-6/IL-6R signaling axis promotes EMT progression, cancer stemness and M2 macrophage polarization in triple-negative breast cancer
Source: PubMed Central journal article supplement (PMC6421700; doi:10.1186/s12943-019-0988-0), 2019-03-18
Supplement: 12943_2019_988_MOESM4_ESM.pdf [file 12943_2019_988_MOESM4_ESM.pdf]

**Fig. S4**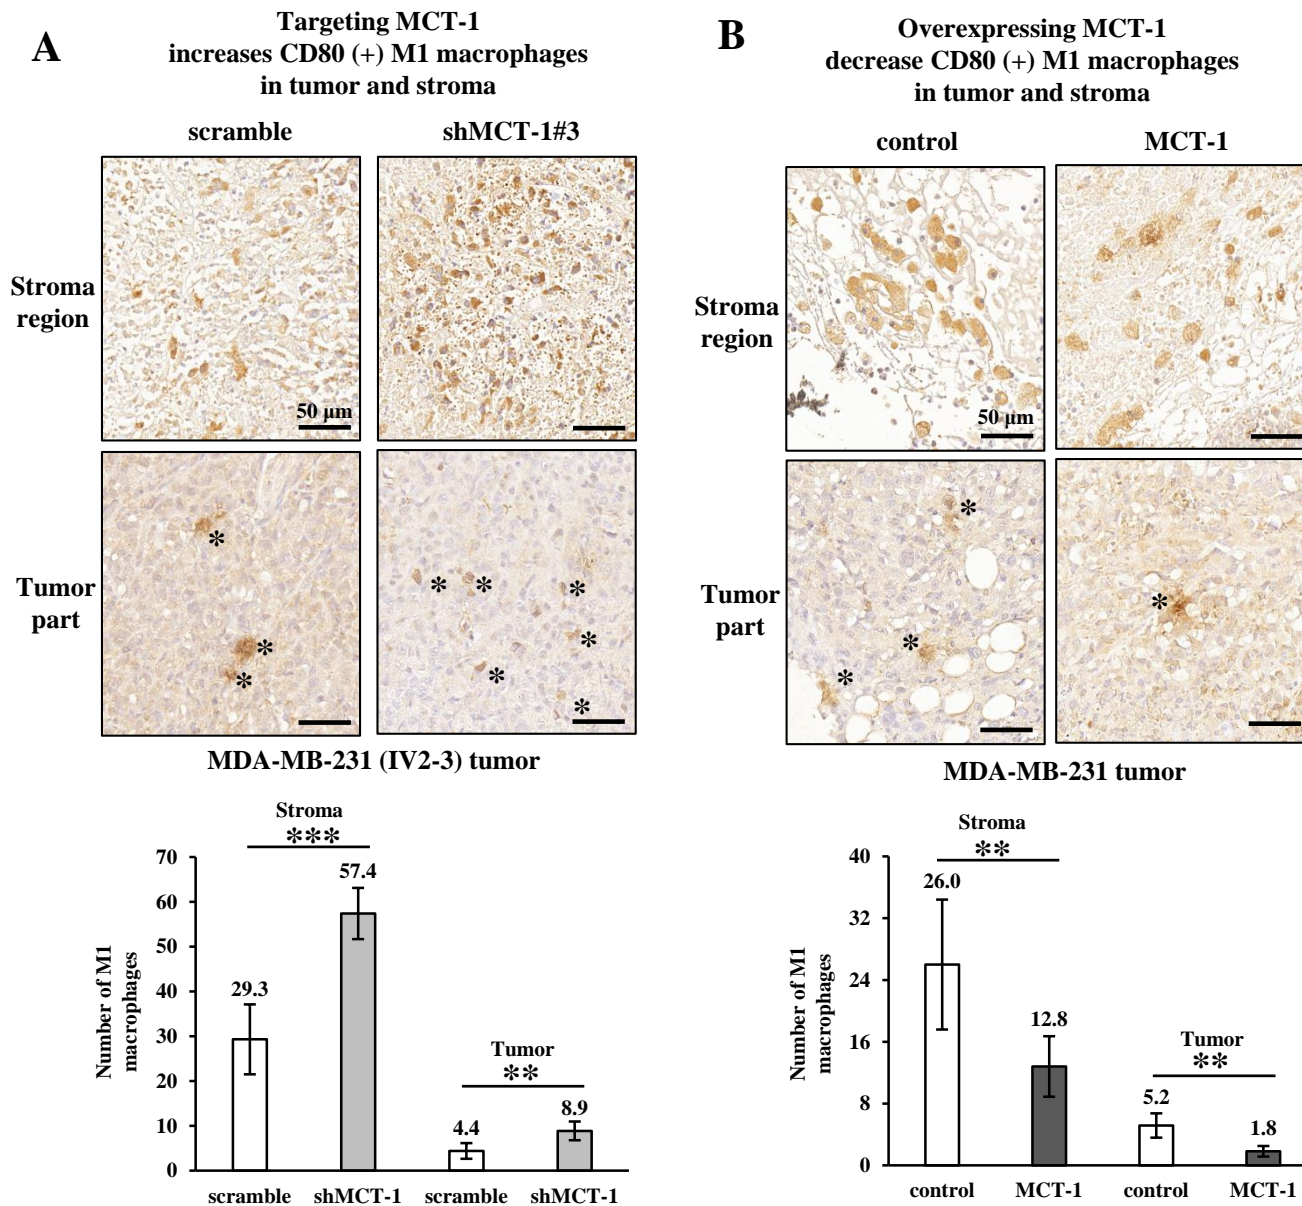

**Supplementary Fig. S4.** CD80-positive M1 macrophages enriched in the TME after MCT-1 knockdown. CD80-positive M1 macrophages accumulated in stroma and retained in MDA-MB-231 (IV2-3) tumors (scramble vs. shMCT-1#3) (A) and in MDA-MB-231 tumors (control vs. MCT-1) (B) were examined by immunohistochemistry studies. The images were captured with 40X objective lens and macrophage numbers were counted. (scramble, n=5 vs. shMCT-1#3, n=8; control, n=6 vs. MCT-1, n=6). Scale bars, 50  $\mu$ m
