# Supplementary material for: MCT-1/miR-34a/IL-6/IL-6R signaling axis promotes EMT progression, cancer stemness and M2 macrophage polarization in triple-negative breast cancer
Source: PubMed Central journal article supplement (PMC6421700; doi:10.1186/s12943-019-0988-0), 2019-03-18

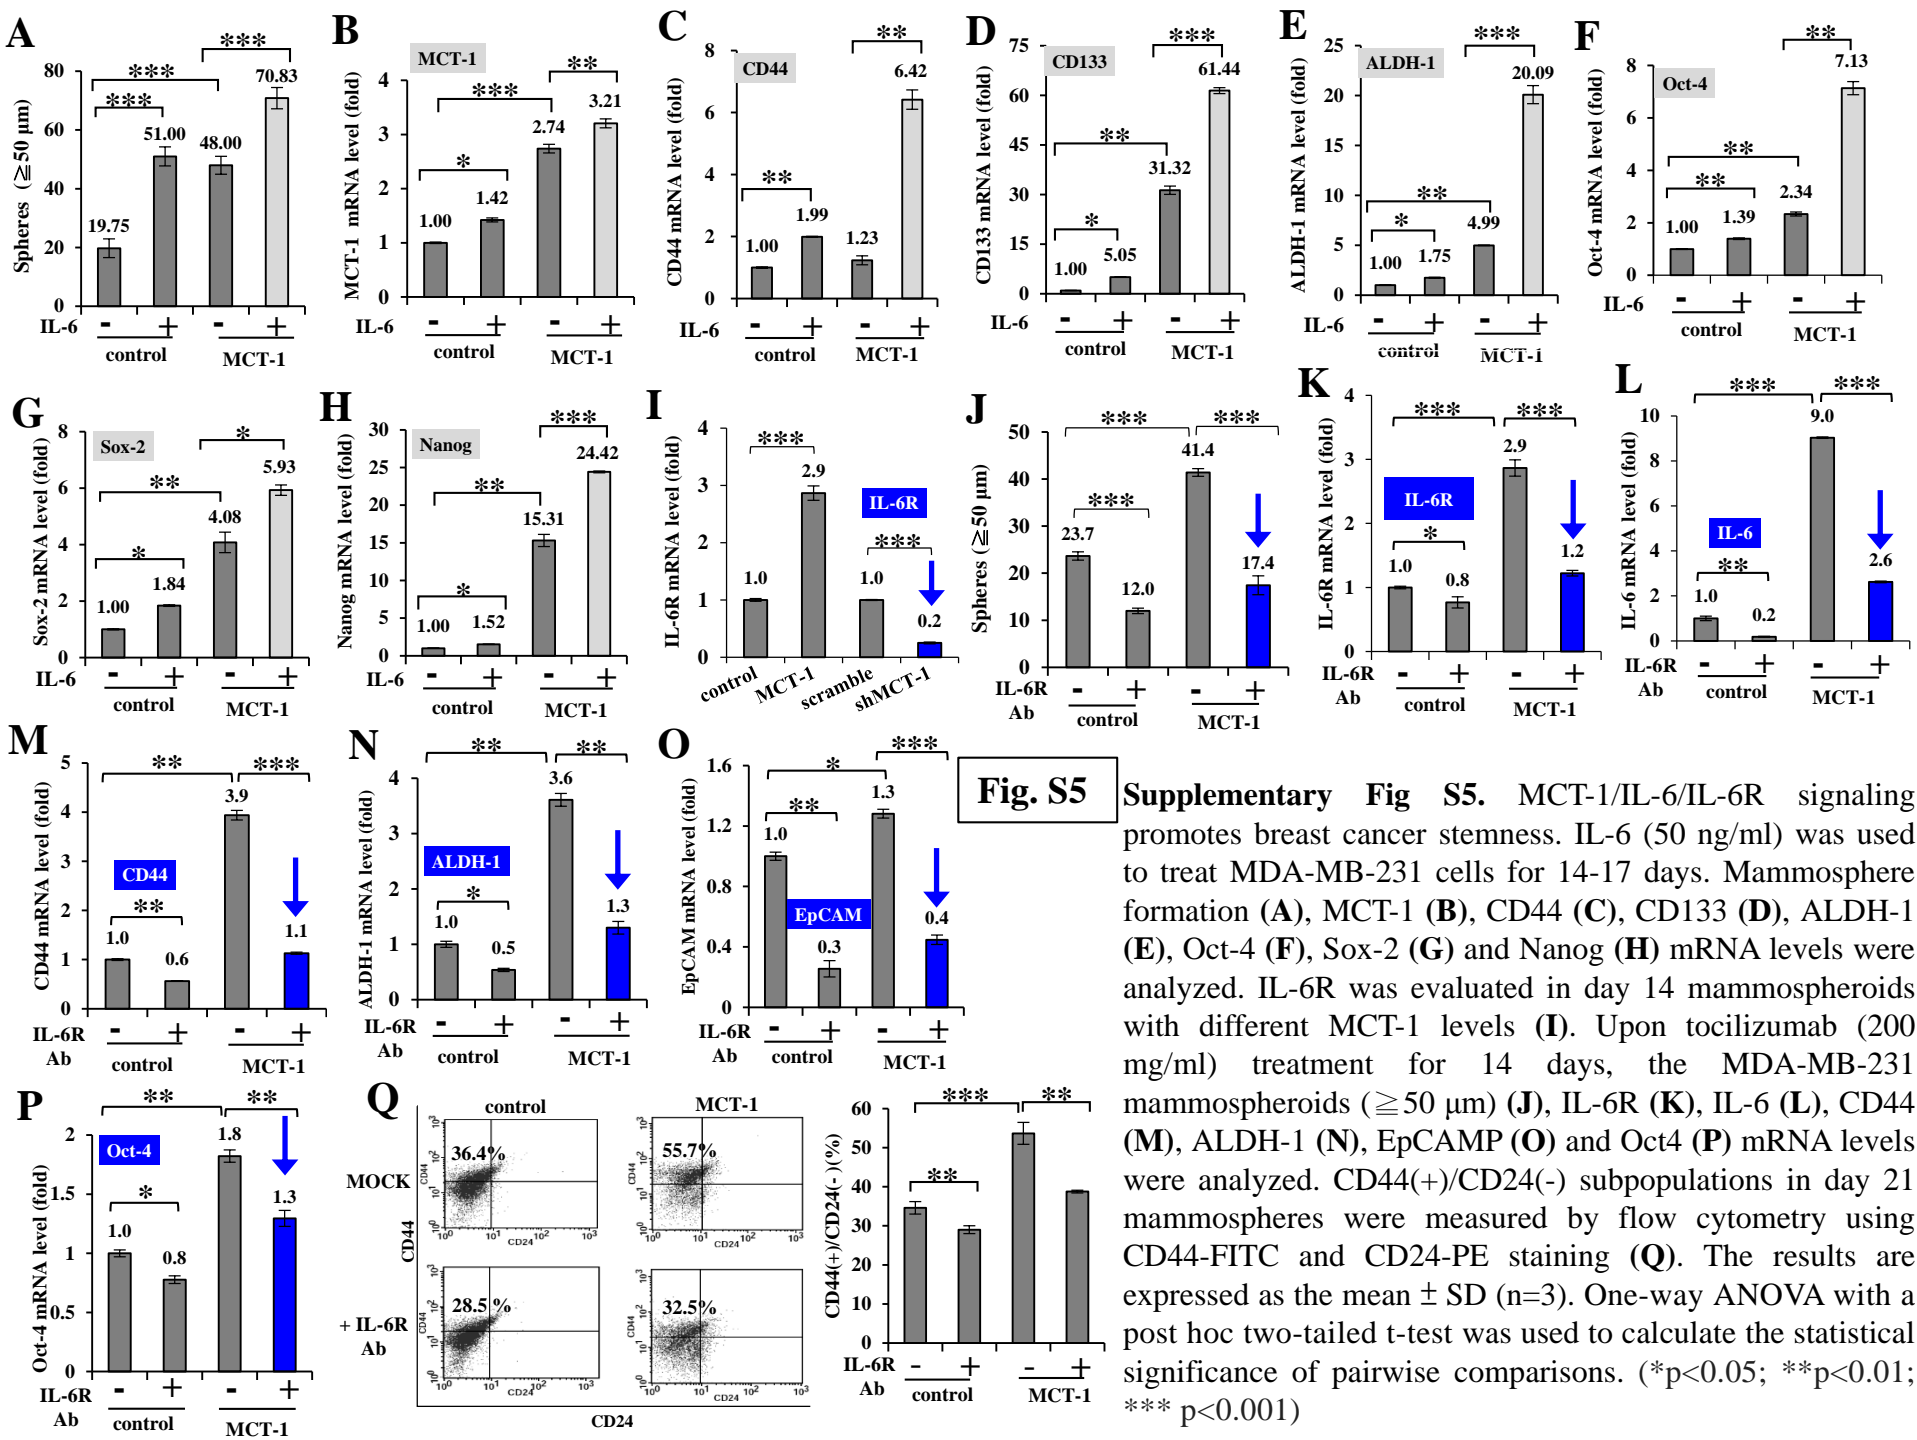

Supplement: 12943_2019_988_MOESM5_ESM.pdf [file 12943_2019_988_MOESM5_ESM.pdf]
