# Supplementary material for: MCT-1/miR-34a/IL-6/IL-6R signaling axis promotes EMT progression, cancer stemness and M2 macrophage polarization in triple-negative breast cancer
Source: PubMed Central journal article supplement (PMC6421700; doi:10.1186/s12943-019-0988-0), 2019-03-18
Supplement: 12943_2019_988_MOESM7_ESM.pdf [file 12943_2019_988_MOESM7_ESM.pdf]

**Fig. S7**

## Silencing MCT-1 induces the tumor suppressor microRNAs

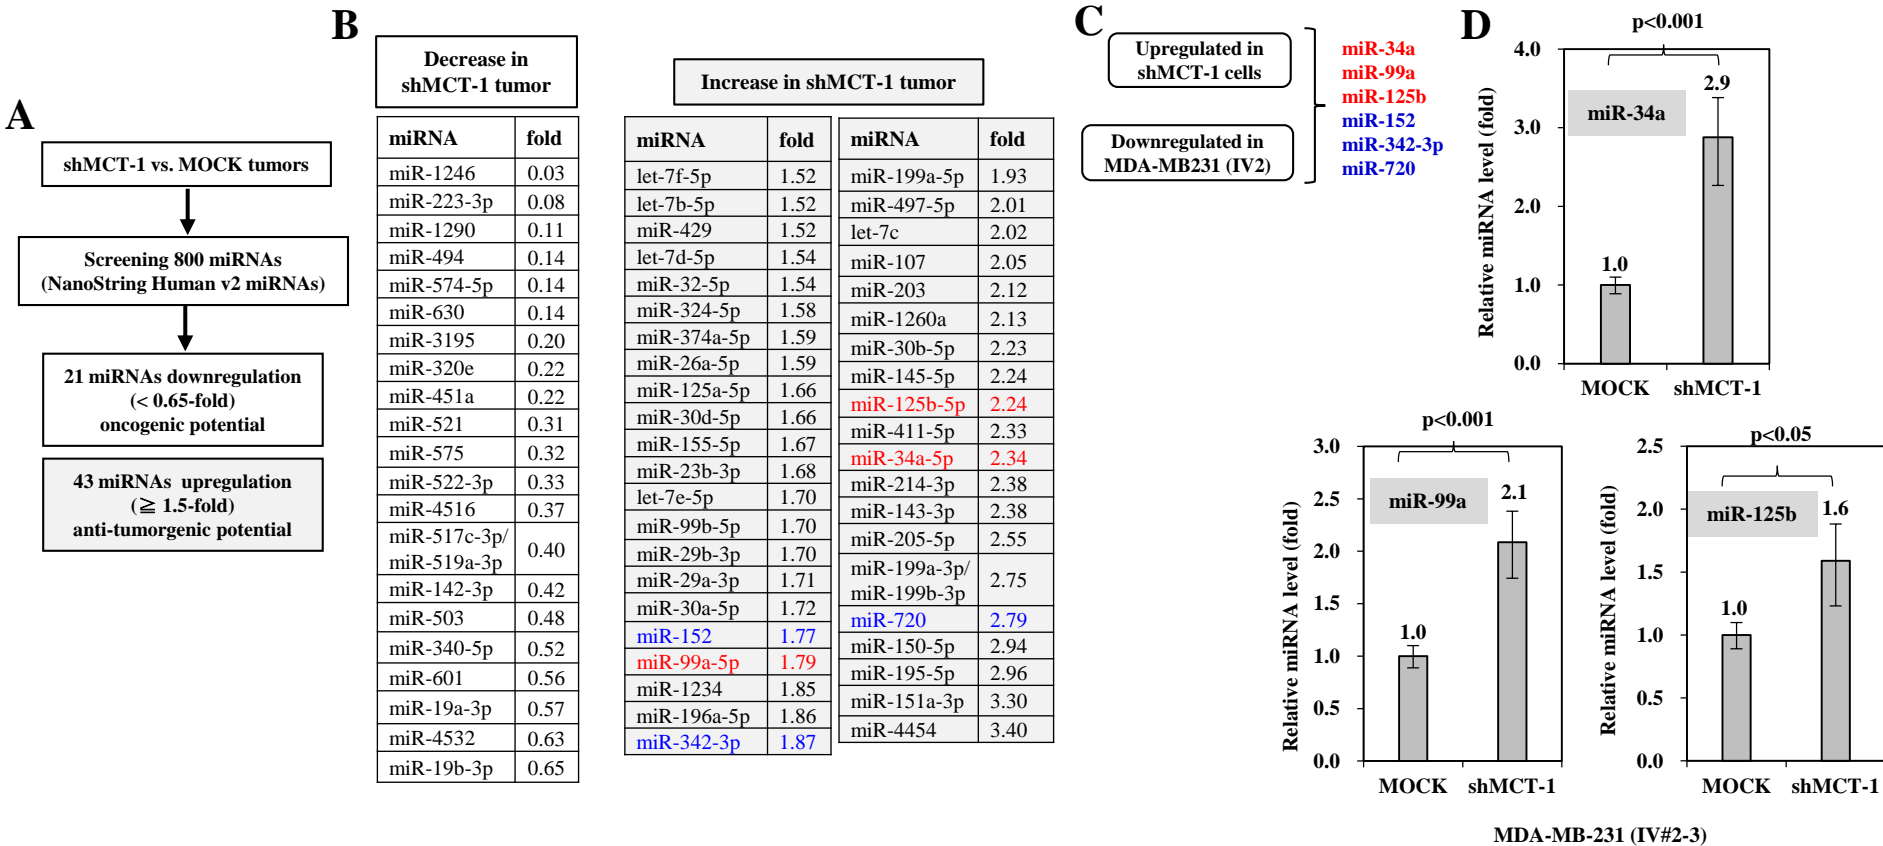

**Supplementary Fig. S7.** MicroRNA profiling in the MCT-1 pathway. **(A)** RNA samples of MDA-MB-468 tumors (scramble, shMCT-1) were used to screen the miRNA library. **(B)** Lists of the miRNAs that were specifically upregulated or downregulated in the shMCT-1 tumor. **(C)** The specific miRNAs upregulated in shMCT-1 cells were found to be downregulated in MDA-MB-231 (IV2-3). **(D)** Levels of miR-34a, miR-99b and miR-125b were confirmed to be induced after MCT-1 silencing compared with MOCK control by qRT-PCR. The results are expressed as the mean  $\pm$  SD (n=3).
