# Supplementary material for: MCT-1/miR-34a/IL-6/IL-6R signaling axis promotes EMT progression, cancer stemness and M2 macrophage polarization in triple-negative breast cancer
Source: PubMed Central journal article supplement (PMC6421700; doi:10.1186/s12943-019-0988-0), 2019-03-18
Supplement: 12943_2019_988_MOESM8_ESM.pdf [file 12943_2019_988_MOESM8_ESM.pdf]

**Supplementary Table S1**

| Gene           |   | Primer sequence                     |
|----------------|---|-------------------------------------|
| $\beta$ -actin | F | 5'-CACCAGGGCGTGATGGTGGG-3'          |
|                | R | 5'-GATGCCTCTCTTGCTCTGG GC-3'        |
| ALDH1A1        | F | 5'-CAC GCC AGA CCT ACC TGT CC-3'    |
|                | R | 5'-GCA GAG CTC CTC AGT TG-3'        |
| CD24           | F | 5'-CTC ACA GAA CAA AGC AAG GGC-3'   |
|                | R | 5'-GCC TAG CGC GAA CCC TCC-3'       |
| CD44           | F | 5'-TTA CAG CCT CAG CAG AGC AC-3'    |
|                | R | 5'-TGA CCT AAG ACG GAG GGA GG-3'    |
| CD133          | F | 5'-GGG AAT GCC TAC TGG AA-3'        |
|                | R | 5'-AAT TTG CAT GAA AGC ACA AGG-3'   |
| EpCAM          | F | 5'-TGC TGG AAT TGT TGT GCT GG-3'    |
|                | R | 5'-AGA TGT CTT CGT CCC ACG-3'       |
| IL-6           | F | 5'- ATTCCTTCTTCTGGTCAGAAACC-3'      |
|                | R | 5'-ACAAAGGATATTCAAACTGCATAGC-3'     |
| IL-6R          | F | 5'- TTCACAGGGCACTGAGGAG -3'         |
|                | R | 5'- GTCTTAATTTGGAGATGCAGGG -3'      |
| MCT-1          | F | 5'-AGGCATTATCTTCATGCTGTCA-3';       |
|                | R | 5'-AATGATGGGCTGTGGCATAT-3'          |
| Nanog          | F | 5'-TGG GAA GAA GCT AAA GAG CCA G-3' |
|                | R | 5'-GGA TGC TTC AAA GCA AGG CA-3'    |
| Oct4           | F | 5'-TGA CCG CAT CTC CCC TCT AA-3'    |
|                | R | 5'-TCT TCC CAG AGG GAG CTC AA-3'    |
| Snail1         | F | 5'-GCG AGC TGC AGG ACT CTA AT-3'    |
|                | R | 5'-GGA CAG AGT CCC AGA TGA GC-3'    |
| SOX2           | F | 5'-CAT GAA GGA GCA CCC GGA TT-3'    |
|                | R | 5'-TTA ATG TGC GCG TAA CTG TG-3'    |
| F4/80          | F | 5'-CAATGAGTGCCTCACCAGCA-3'          |
|                | R | 5'-TGGGCAAGCTCTTGGATCTG-3'          |
| CD86           | F | 5'-GCTTTGCTTCTCTGCTGCTG-3'          |
|                | R | 5'-GGCAGGTCTGCAGTCTCATT-3'          |
| CD163          | F | 5'-CCGGGAGATGAATTCTTGCCT-3'         |
|                | R | 5'-AGACACAGAAATTAGTTCAGCAGCA-3'     |
| CD206          | F | 5'-CTGAATTGTACTGGTCTGTCCT-3'        |
|                | R | 5'-GCTTAGATGTGGTGCTGTGG-3'          |
